# Supplementary material for: Expanding the Diversity of Mycobacteriophages: Insights into Genome Architecture and Evolution
Source: PLoS One. 2011 Jan 27;6(1):e16329. doi: 10.1371/journal.pone.0016329 (PMC3029335; doi:10.1371/journal.pone.0016329)
Supplement: Figure S5 — Derivation of consensus sequences for Cluster A genome stoperator sites. The 13 bp consensus stoperator sequence for each of 16 Cluster A phages was derived by searching for related sequences in each genome. The base distribution of each of the 13 positions is shown for each genome, with the consensus shown below. A single consensus base was assigned if it occurred in greater than 85% of the sites, and if not then standard abbreviations are used, W: A or T; D: G, T or A; V: G, C or A; M: A or C; N: anything. All sites listed have no more than two deviations from the consensus. For L5, the sites are the same as those described previously [36] where there is experimental evidence supporting repressor binding. For Bxb1, the sites listed are the same as described previously [37] except for inclusion of one additional potential site identified at coordinates 508–520 on the complement strand, and omission of one site previously identified at coordinates 44,803–44,815 that has more than two departures from the consensus. The previously described site at 48,867–48,855 has more than two departures from the consensus but has been show experimentally to be bound by the Bxb1 repressor [37]. We note that in the absence of experimental evidence to address the binding specificity of each of the A1 repressors that these compilations are likely to have omitted some additional binding sites while including some that may be recognized poorly by the cognate repressor. Phage D29 was omitted from the list since it does not express an active repressor, although a consensus stoperator sequence has been described previously which is identical to that of L5 [53]. (XLSX) [file pone.0016329.s005.xlsx]

## Sheet: Sheet1
		# sites	Position	1	2	3	4	5	6	7	8	9	10	11	12	13
Phage	Cluster
Bethlehem	A1	31
			g	31	0	0	0	0	28	0	17	0	0	0	1	31
			c	0	0	0	2	30	0	0	0	0	27	0	0	0
			t	0	31	31	0	1	1	18	1	31	0	1	0	0
			a	0	0	0	29	0	2	13	13	0	4	30	30	0
			Consensus	G	T	T	A	C	G	W	D	T	C	A	A	G
Bxb1	A1	33
			g	33	0	0	0	0	32	1	18	0	0	0	0	32
			c	0	0	0	0	33	0	0	0	0	30	0	0	0
			t	0	33	33	0	0	0	18	3	33	0	1	0	0
			a	0	0	0	33	0	1	14	12	0	3	32	33	1
			Consensus	G	T	T	A	C	G	W	D	T	C	A	A	G
DD5	A1	32
			g	32	0	0	0	0	29	0	20	0	0	0	0	32
			c	0	0	0	1	32	0	0	0	0	28	0	0	0
			t	0	32	32	0	0	1	19	2	32	0	1	0	0
			a	0	0	0	31	0	2	13	10	0	4	31	32	0
			Consensus	G	T	T	A	C	G	W	D	T	C	A	A	G
Jasper	A1	36
			g	36	0	0	0	0	34	0	23	1	0	1	0	36
			c	0	0	0	2	36	0	0	0	0	31	0	0	0
			t	0	36	36	0	0	1	25	1	35	0	1	0	0
			a	0	0	0	34	0	1	11	12	0	5	34	36	0
			Consensus	G	T	T	A	C	G	W	D	T	C	A	A	G
KBG	A1	26
			g	26	0	0	0	0	25	0	15	0	0	0	0	25
			c	0	0	0	1	26	0	0	0	0	23	0	0	0
			t	0	26	26	0	0	0	15	2	26	0	0	0	0
			a	0	0	0	25	0	1	11	9	0	3	26	26	1
			Consensus	G	T	T	A	C	G	W	D	T	C	A	A	G
Lockley	A1	32
			g	32	0	0	0	0	30	0	20	0	0	0	0	32
			c	0	0	0	2	32	0	0	0	0	27	0	0	0
			t	0	32	32	0	0	1	19	2	32	0	1	0	0
			a	0	0	0	30	0	1	13	10	0	5	31	32	0
			Consensus	G	T	T	A	C	G	W	D	T	C	A	A	G
Skipole	A1	34
			g	34	0	0	0	1	32	1	18	0	0	0	0	34
			c	0	0	0	1	32	0	2	0	1	32	0	0	0
			t	0	34	34	0	1	0	23	2	33	0	1	0	0
			a	0	0	0	33	0	2	8	14	0	2	33	34	0
			Consensus	G	T	T	A	C	G	W	D	T	C	A	A	G
Solon	A1	31
			g	31	0	0	0	0	29	1	15	0	0	0	0	31
			c	0	0	1	2	31	0	1	0	0	29	0	0	0
			t	0	31	30	0	0	1	16	3	31	0	1	0	0
			a	0	0	0	29	0	1	13	13	0	2	30	31	0
			Consensus	G	T	T	A	C	G	W	D	T	C	A	A	G
U2	A1	27
			g	27	0	0	0	0	23	1	14	0	0	0	1	27
			c	0	0	0	2	27	0	0	0	0	25	0	0	0
			t	0	27	27	0	0	1	16	0	27	0	1	0	0
			a	0	0	0	25	0	3	10	13	0	2	26	26	0
			Consensus	G	T	T	A	C	G	W	D	T	C	A	A	G
Che12	A2	23
			g	23	23	0	23	21	2	0	22	0	0	0	0	23
			c	0	0	2	0	1	3	1	0	0	23	2	0	0
			t	0	0	21	0	0	0	22	1	23	0	0	0	0
			a	0	0	0	0	1	18	0	0	0	0	21	23	0
			Consensus	G	G	T	G	G	V	T	G	T	C	A	A	G
L5	A2	24
			g	24	24	0	24	21	0	0	24	0	23	0	0	23
			c	0	0	1	0	0	18	0	0	0	0	0	0	0
			t	0	0	23	0	2	0	24	0	24	0	0	0	0
			a	0	0	0	0	1	6	0	0	0	1	24	24	1
			Consensus	G	G	T	G	G	M	T	G	T	C	A	A	G
Pukovnik	A2	25
			g	25	25	0	24	18	0	0	25	0	0	0	0	25
			c	0	0	0	0	1	6	1	0	0	24	0	0	0
			t	0	0	25	1	4	0	24	0	24	0	0	0	0
			a	0	0	0	0	2	19	0	0	1	1	25	25	0
			Consensus	G	G	T	G	N	M	T	G	T	C	A	A	G
RedRock	A2	25
			g	25	25	0	24	4	0	0	25	0	0	0	0	25
			c	0	0	0	0	5	4	1	0	0	24	0	0	0
			t	0	0	25	0	7	0	24	0	22	0	0	0	0
			a	0	0	0	1	9	21	0	0	3	1	25	25	0
			Consensus	G	G	T	G	N	M	T	G	T	C	A	A	G
Bxz2	A3	23
			g	23	1	0	0	0	0	1	22	1	0	0	0	23
			c	0	1	0	21	1	22	0	0	0	23	1	0	0
			t	0	21	23	0	22	0	22	1	22	0	0	0	0
			a	0	0	0	2	0	1	0	0	0	0	22	23	0
			Consensus	G	T	T	C	T	C	T	G	T	C	A	A	G
Eagle	A4	25
			g	25	2	22	0	23	0	0	25	0	0	0	0	24
			c	0	0	0	23	1	0	0	0	0	24	0	0	0
			t	0	20	0	1	0	0	25	0	24	0	1	0	0
			a	0	3	3	1	1	25	0	0	1	1	24	25	1
			Consensus	G	T	G	C	G	A	T	G	T	C	A	A	G
Peaches	A4	26
			g	26	1	24	0	24	0	0	26	0	0	0	0	25
			c	0	0	0	24	1	0	0	0	0	25	0	0	0
			t	0	21	0	1	0	0	25	0	25	0	1	0	0
			a	0	4	2	1	1	26	1	0	1	1	25	26	1
			Consensus	G	T	G	C	G	A	T	G	T	C	A	A	G
Total		453
			g	453	101	46	95	112	264	5	329	2	23	1	2	448
			c	0	1	4	81	289	53	6	0	1	395	3	0	0
			t	0	344	398	3	37	6	335	18	444	0	10	0	0
			a	0	7	5	274	15	130	107	106	6	35	439	451	5
			Total	453	453	453	453	453	453	453	453	453	453	453	453	453
