# Supplementary material for: Expanding the Diversity of Mycobacteriophages: Insights into Genome Architecture and Evolution
Source: PLoS One. 2011 Jan 27;6(1):e16329. doi: 10.1371/journal.pone.0016329 (PMC3029335; doi:10.1371/journal.pone.0016329)
Supplement: Table S1 — Author contributions. (XLSX) [file pone.0016329.s006.xlsx]

## Sheet: Sheet1
Table S1. Author contributions
					Contributions: PLoS categories					Contributions: SEA/University of Pittsburgh categories
First Name	Middle I.	Last name	Institution	email	PLosOne - 1 Conceived/Designed	PLosOne - 2 Performed Exp	PLosOne - 3 Analysis	PLosOne - 4 mat./tools	PLosOne - 5 wrote	Role	Genome Choice Participa-tion (Yes/No)	Phage Purification Amplification DNA prep (Yes/No)	Physical analysis Ems/REDs (Yes/No)	Annotation (Yes/No)	Comparative analysis (Yes/No)	Reviewed manuscript (Yes/No)
Marcella	L	Erb	University of California San Diego	merb@ucsd.edu	No	Yes	Yes	No	No	Instructor	yes	yes	yes	yes	yes	yes
Sahrish		Ekram	University of California San Diego	sahrishekram@yahoo.com	No	Yes	Yes	No	No	Student	Yes	Yes	No	Yes	Yes	Yes
Andrew	A.S.	Ang	University of California San Diego	andrewang02@yahoo.com	No	Yes	Yes	No	No	Student	Yes	Yes	No	Yes	Yes	Yes
Phillip		Wu	University of California San Diego	p9wu@ucsd.edu	No	Yes	Yes	No	No	Student	Yes	Yes	Yes	Yes	Yes	Yes
Danielle	H	Wang	University of California San Diego	dhw001@ucsd.edu	No	Yes	Yes	No	No	Student	Yes	Yes	Yes	Yes	Yes	Yes
Kayla	N	Busby	University of California San Diego	knbusby@ucsd.edu	No	Yes	Yes	No	No	Student	Yes	No	No	Yes	Yes	Yes
Kevin	J	He	University of California San Diego	khe@ucsd.edu	No	Yes	Yes	No	No	Student	Yes	Yes	Yes	Yes	Yes	Yes
Leila		Haghighat	University of California San Diego	leila.haghighat@yahoo.com	No	Yes	Yes	No	No	Student	Yes	Yes	Yes	Yes	Yes	Yes
Tina	Q	Lu	University of California San Diego	tlu826@gmail.com	No	Yes	Yes	No	No	Student	Yes	Yes	Yes	Yes	Yes	Yes
Jason	H	Ho	University of California San Diego	jhh007@ucsd.edu	No	Yes	Yes	No	No	Student	Yes	Yes	Yes	Yes	Yes	Yes
Katrina	T	Nguyen	University of California San Diego	katrinatnguyen@gmail.com	No	Yes	Yes	No	No	Student	Yes	Yes	Yes	Yes	Yes	Yes
Emilie	T	Nguyen	University of California San Diego	etn004@ucsd.edu	No	Yes	Yes	No	No	Student	Yes	Yes	Yes	Yes	Yes	Yes
Tin-Yun		Tang	University of California San Diego	t7tang@ucsd.edu	No	Yes	Yes	No	No	Student	Yes	Yes	Yes	Yes	Yes	Yes
J Bradley		Segal	University of California San Diego	bradsegal18@gmail.com	No	Yes	Yes	No	No	Student	Yes	Yes	Yes	Yes	Yes	Yes
Theresa	W	Wong	University of California San Diego	twwong@ucsd.edu	No	Yes	Yes	No	No	Student	Yes	Yes	Yes	Yes	Yes	Yes
Hannah		Wang	University of California San Diego	haw006@ucsd.edu	No	Yes	Yes	No	No	Student	Yes	Yes	Yes	Yes	Yes	No
Yun jeong		Yang	University of California San Diego	yjy003@ucsd.edu	No	Yes	Yes	No	No	Student	Yes	Yes	Yes	Yes	Yes	Yes
Crystal		Estrada	University of California San Diego	crestrad@ucsd.edu	No	Yes	Yes	No	No	Student	Yes	Yes	Yes	Yes	Yes	Yes
Jonathan		Tsay	University of California San Diego	jon.tsay@gmail.com	No	Yes	Yes	No	No	Student	Yes	Yes	Yes	Yes	Yes	Yes
Bridget	G	Guiza	University of California San Diego	bguiza@ucsd.edu	No	Yes	Yes	No	No	Student	Yes	Yes	Yes	Yes	Yes	Yes
Kit		Pogliano	University of California San Diego	kpogliano@ucsd.edu	No	Yes	Yes	No	No	Instructor	Yes	Yes	Yes	Yes	Yes	Yes
Joe		Pogliano	University of California San Diego	jpogliano@ucsd.edu	No	Yes	Yes	No	No	Instructor	Yes	Yes	Yes	Yes	Yes	Yes
Marie	D	Anderson	Spelman College	mariedanderson@yahoo.com	No	Yes	Yes	No	No	Student	Yes	Yes	Yes	Yes	Yes	Yes
Breyon	R	Dixon	Spelman College	dixonb3@gmail.com	No	Yes	Yes	No	No	Student	Yes	Yes	Yes	Yes	Yes	Yes
Zindzi	D	George	Spelman College	zindzi.g@gmail.com	No	Yes	Yes	No	No	Student	Yes	Yes	Yes	Yes	Yes	Yes
Jazmyn	J	McCloud	Spelman College	jazmyn.mccloud@yahoo.com	No	Yes	Yes	No	No	Student	Yes	Yes	Yes	Yes	Yes	Yes
Lindsay	A	Parnell	Spelman College	lparnel1@scmail.spelman.edu	No	Yes	Yes	No	No	Student	Yes	Yes	Yes	Yes	Yes	Yes
Yetta	M	Robinson	Spelman College	yrobins4@scmail.spelman.edu	No	Yes	Yes	No	No	Student	Yes	Yes	Yes	Yes	Yes	Yes
Blaire	C	Spaulding	Spelman College	Bspauldi@scmail.spelman.edu	No	Yes	Yes	No	No	Student	Yes	Yes	Yes	Yes	Yes	Yes
Melina	Y	Zúniga	Spelman College	melinazuniga4@gmail.com	No	Yes	Yes	No	No	Student	Yes	Yes	Yes	Yes	Yes	Yes
Cynthia	M	Bauerle	Spelman College/Howard Hughes Medical Institute	bauerlec@hhmi.org	No	Yes	Yes	No	No	Instructor	Yes	Yes	Yes	Yes	Yes	Yes
Kevin	W	Bradley	Howard Hughes Medical Institute	bradleyk@hhmi.org	No	No	No	Yes	No	SEA Staff	No	No	No	No	No	Yes
Lucia	P.	Barker	Howard Hughes Medical Institute	barkerl@hhmi.org	No	No	No	Yes	No	SEA Staff	No	No	No	No	No	Yes
Tuajuanda	C.	Jordan	Howard Hughes Medical Institute	jordant@hhmi.org	No	No	No	Yes	No	SEA Director	No	No	No	No	No	Yes
Steven	M.	Caruso	University of Maryland Baltimore County	scaruso@umbc.edu	No	Yes	Yes	No	No	Instructor	Yes	Yes	Yes	Yes	Yes	Yes
James	W.	Sandoz	University of Maryland Baltimore County	sandoz@umbc.edu	No	Yes	Yes	No	No	Instructor	Yes	Yes	Yes	Yes	Yes	Yes
Jessica	S.	Kelsey	University of Maryland Baltimore County	jsaz1@umbc.edu	No	Yes	Yes	No	No	Instructor	Yes	Yes	Yes	Yes	Yes	Yes
Rebecca		Goldstein	University of Maryland Baltimore County	rebgo1@umbc.edu	No	Yes	Yes	No	No	Student	Yes	Yes	Yes	Yes	Yes	Yes
Kathryn	E.	Loesser-Casey	University of Mary Washington	kloesser@umw.edu	No	Yes	Yes	No	No	Instructor	Yes	Yes	Yes	Yes	Yes	Yes
Lynn	O.	Lewis	University of Mary Washington	llewis@umw.edu	No	Yes	Yes	No	No	Instructor	Yes	Yes	Yes	Yes	Yes	Yes
Anne	M.	Campbell	University of Mary Washington	acampbe2@mail.umw.edu	No	Yes	Yes	No	No	Student	Yes	Yes	Yes	Yes	Yes	Yes
Brandy	M.	Simpson	University of Mary Washington	bsimpso2@mail.umw.edu	No	Yes	Yes	No	No	Student	Yes	Yes	Yes	Yes	Yes	Yes
Samantha	C.	Wendler	University of Mary Washington	swendler@mail.umw.edu	No	Yes	Yes	No	No	Student	Yes	Yes	Yes	Yes	Yes	Yes
Gail	V.	Larkin	University of Mary Washington	glarkin@mail.umw.edu	No	Yes	Yes	No	No	Student	Yes	Yes	Yes	Yes	Yes	Yes
Christine	A.	Boyer	University of Mary Washington	cboyer@mail.umw.edu	No	Yes	Yes	No	No	Student	Yes	Yes	Yes	Yes	Yes	Yes
Katherine	L.	Belfield	University of Mary Washington	kt.b@verizon.net	No	Yes	Yes	No	No	Student	Yes	Yes	Yes	Yes	Yes	Yes
Larisa	A.	Kerrigan	University of Mary Washington	larisa827@yahoo.com	No	Yes	Yes	No	No	Student	Yes	Yes	Yes	Yes	Yes	Yes
Asma		Latif	University of Mary Washington	alatif2@mail.umw.edu	No	Yes	Yes	No	No	Student	Yes	Yes	Yes	Yes	Yes	Yes
Matthew	B.	Alfano	University of Mary Washington	malfano@mail.umw.edu	No	Yes	Yes	No	No	Student	Yes	Yes	Yes	Yes	Yes	Yes
Krysta	R.	Guiney-Olsen	University of Mary Washington	kguineyo@mail.umw.edu	No	Yes	Yes	No	No	Student	Yes	Yes	Yes	Yes	Yes	Yes
Zein		Al-Atrache	University of Mary Washington	z.alatrache@gmail.com	No	Yes	Yes	No	No	Student	Yes	Yes	Yes	Yes	Yes	Yes
Michael	P.	Tokarz	University of Mary Washington	Tokarz913@aol.com	No	Yes	Yes	No	No	Student	Yes	Yes	Yes	Yes	Yes	Yes
Ellen	R.	Higinbotham	University of Mary Washington	ehiginbo@mail.umw.edu	No	Yes	Yes	No	No	Student	Yes	Yes	Yes	Yes	Yes	Yes
Louise	M	Temple	James Madison University	templelm@jmu.edu	No	Yes	Yes	No	No	Instructor	Yes	Yes	Yes	Yes	Yes	Yes
Steven	G	Cresawn	James Madison University	cresawsg@jmu.edu	No	Yes	Yes	Yes	No	Instructor	Yes	Yes	Yes	Yes	Yes	Yes
Jonathan	M	Barrett	James Madison University	barretjm@dukes.jmu.edu	No	Yes	Yes	No	No	Student	No	No	No	Yes	Yes	Yes
Chelsea	L	Cockburn	James Madison University	cockbucl@dukes.jmu.edu	No	Yes	Yes	No	No	Student	Yes	No	Yes	Yes	Yes	Yes
Isaac	R	Masters	James Madison University	masterir@dukes.jmu.edu	No	Yes	Yes	No	No	Student	Yes	No	Yes	Yes	No	Yes
Russell	D	Green	James Madison University	greenrd@dukes.jmu.edu	No	Yes	Yes	No	No	Student	Yes	No	Yes	Yes	No	Yes
Victoria	A	Bradley	James Madison University	bradleva@dukes.jmu.edu	No	Yes	Yes	No	No	Student	No	No	No	Yes	No	Yes
Stephen	B	Taylor	James Madison University	taylorsb@dukes.jmu.edu	No	Yes	Yes	No	No	Student	Yes	No	Yes	Yes	No	Yes
Stephanie	E	Trapani	James Madison University	trapanse@dukes.jmu.edu	No	Yes	Yes	No	No	Student	Yes	No	Yes	Yes	No	Yes
Alexander	P	Troum	James Madison University	troumap@dukes.jmu.edu	No	Yes	Yes	No	No	Student	Yes	No	Yes	Yes	No	Yes
Kathryn	M	Sinclair	James Madison University	sinclakm@dukes.jmu.edu	No	Yes	Yes	No	No	Student	Yes	No	Yes	Yes	No	Yes
Amanda	R	Schott	James Madison University	schottar@dukes.jmu.edu	No	Yes	Yes	No	No	Student	Yes	No	Yes	Yes	No	Yes
Nichols	E	Amy	James Madison University	nicho2ae@dukes.jmu.edu	No	Yes	Yes	No	No	Student	Yes	No	Yes	Yes	No	Yes
Lyons	M	Tatyana	James Madison University	lyonstm@dukes.jmu.edu	No	Yes	Yes	No	No	Student	Yes	Yes	Yes	Yes	No	Yes
Murray	A	Katelyn	James Madison University	murra2ka@dukes.jmu.edu	No	Yes	Yes	No	No	Student	Yes	No	No	Yes	No	Yes
Seegren	V	Philip	James Madison University	seegrepv@dukes.jmu.edu	No	Yes	Yes	No	No	Student	Yes	No	No	Yes	No	Yes
Dee	R	Denver	Oregon State University	denver@cgrb.oregonstate.edu	No	Yes	Yes	No	No	Instructor	No	Yes	No	Yes	Yes	Yes
Barbara	J	Taylor	Oregon State University	taylorb@science.oregonstate.edu	No	Yes	Yes	No	No	Instructor	No	Yes	No	Yes	Yes	Yes
Christine	E	Schnitzler	Oregon State University	schnitch@science.oregonstate.edu	No	Yes	Yes	No	No	Instructor	No	Yes	No	Yes	Yes	Yes
Alyssa	B.	Carey	Oregon State University	careyal@onid.orst.edu	No	Yes	Yes	No	No	Student	No	No	No	Yes	Yes	Yes
Lauren		Forbes	Oregon State University	forbesla@onid.orst.edu	No	Yes	Yes	No	No	Student	No	No	No	Yes	Yes	Yes
Roberto	A.	Garcia III	Oregon State University	garcirob@onid.orst.edu	No	Yes	Yes	No	No	Student	No	No	No	Yes	Yes	Yes
Daryl		Khaw	Oregon State University	khawd@onid.orst.edu	No	Yes	Yes	No	No	Student	No	No	No	Yes	Yes	Yes
Junghee		Kim	Oregon State University	kimjungh@onid.orst.edu	No	Yes	Yes	No	No	Student	No	No	No	Yes	Yes	Yes
Nicholas	C	Lowery	Oregon State University	loweryni@onid.orst.edu	No	Yes	Yes	No	No	Student	No	Yes	Yes	Yes	Yes	Yes
Rachel	A.	Miller	Oregon State University	millerra@onid.orst.edu	No	Yes	Yes	No	No	Student	No	No	No	Yes	Yes	Yes
Elvis	T	Nguyen	Oregon State University	nguyenel@onid.orst.edu	No	Yes	Yes	No	No	Student	No	No	No	Yes	Yes	Yes
Tamsen	M	Polley	Oregon State University	polleyt@onid.orst.edu	No	Yes	Yes	No	No	Student	No	No	No	Yes	Yes	Yes
Shepardson	W	Jonathan	Oregon State University	shepardj@onid.orst.edu	No	Yes	Yes	No	No	Student	No	No	No	Yes	Yes	Yes
Menon		Anjali	Oregon State University	menona@onid.orst.edu	No	Yes	Yes	No	No	Student	No	No	No	Yes	Yes	Yes
Puopolo	J	Erica	Oregon State University	puopoloe@onid.orst.edu	No	Yes	Yes	No	No	Student	No	No	No	Yes	Yes	Yes
Goff		Shannon	Oregon State University	goffsh@onid.orst.edu	No	Yes	Yes	No	No	Student	No	No	No	Yes	Yes	Yes
Hilary	M	Whelan	College of William & Mary	hmwhelan@email.wm.edu	No	Yes	Yes	No	No	Student	No	Yes	Yes	Yes	Yes	Yes
Molly	J	McDonough	College of William & Mary	mjmcdonough@email.wm.edu	No	Yes	Yes	No	No	Student	No	No	Yes	Yes	Yes	Yes
Samuel	E	Harvey	College of William & Mary	seharvey@email.wm.edu	No	Yes	Yes	No	No	Student	No	No	Yes	Yes	Yes	Yes
Jillian	M	Walton	College of William & Mary	jmwalton@email.wm.edu	No	Yes	Yes	No	No	Student	No	No	Yes	Yes	Yes	Yes
Kobie	C	Gordon	College of William & Mary	kcgordon@email.wm.edu	No	Yes	Yes	No	No	Student	No	No	Yes	Yes	Yes	Yes
Allison	M	Perz	College of William & Mary	amperz@email.wm.edu	No	Yes	Yes	No	No	Student	No	No	Yes	Yes	Yes	Yes
Arrykka	S	Jackson	College of William & Mary	asjackson@email.wm.edu	No	Yes	Yes	No	No	Student	No	No	Yes	Yes	Yes	Yes
Margaret	S	Saha	College of William & Mary	mssaha@wm.edu	No	Yes	Yes	No	No	Instructor	No	Yes	Yes	Yes	Yes	Yes
Kurt	E	Williamson	College of William & Mary	kewilliamson@wm.edu	No	Yes	Yes	No	No	Instructor	No	Yes	Yes	Yes	Yes	Yes
Mark	H	Forsyth	College of William & Mary	mhfors@wm.edu	No	Yes	Yes	No	No	Instructor	No	Yes	Yes	Yes	Yes	Yes
Turi	A.	Alcoser	Carnegie Mellon University	turi@cmu.edu	No	Yes	Yes	No	No	Student	Yes	Yes	No	Yes	Yes	Yes
Lisa	M.	Alexander	Carnegie Mellon University	lalexand@andrew.cmu.edu	No	Yes	Yes	No	No	Student	Yes	Yes	No	Yes	Yes	Yes
Ian	M.	Bayles	Carnegie Mellon University	ibayles@andrew.cmu.edu	No	Yes	Yes	No	No	Student	Yes	Yes	Yes	Yes	Yes	Yes
Keshav		Budwal	Carnegie Mellon University	kbudwal@cmu.edu	No	Yes	Yes	No	No	Student	Yes	No	Yes	Yes	Yes	Yes
Ian	W.	Campbell	Carnegie Mellon University	iwc@andrew.cmu.edu	No	Yes	Yes	No	No	Student	Yes	Yes	Yes	Yes	Yes	Yes
Lianne	B.	Cohen	Carnegie Mellon University	lbcohen@andrew.cmu.edu	No	Yes	Yes	No	No	Student	Yes	Yes	No	Yes	Yes	Yes
Belle	E.V.	English	Carnegie Mellon University	archangel_lyrix13@yahoo.com	No	Yes	Yes	No	No	Student	Yes	No	No	Yes	Yes	Yes
Laura	Z.	Filliger	Carnegie Mellon University	lzf@andrew.cmu.edu	No	Yes	Yes	No	No	Student	Yes	Yes	Yes	Yes	Yes	Yes
Tyler	M.	Fox	Carnegie Mellon University	tmfox@andrew.cmu.edu	No	Yes	Yes	No	No	Student	Yes	Yes	Yes	Yes	Yes	Yes
Stephanie	L.	Guerra	Carnegie Mellon University	slguerra@andrew.cmu.edu	No	Yes	Yes	No	No	Student	Yes	No	No	Yes	Yes	Yes
Siping		He	Carnegie Mellon University	sipingh@andrew.cmu.edu	No	Yes	Yes	No	No	Student	Yes	No	Yes	Yes	Yes	Yes
Kaitlin	E.	Healy	Carnegie Mellon University	khealy@andrew.cmu.edu	No	Yes	Yes	No	No	Student	Yes	No	No	Yes	Yes	Yes
Paul	G.	Jasinto	Carnegie Mellon University	pgj@andrew.cmu.edu	No	Yes	Yes	No	No	Student	Yes	Yes	Yes	Yes	Yes	Yes
Andrew	J.	Medenbach	Carnegie Mellon University	amedenba@andrew.cmu.edu	No	Yes	Yes	No	No	Student	Yes	Yes	Yes	Yes	Yes	Yes
Rachel	E.	Pferdehirt	Carnegie Mellon University	repferde@andrew.cmu.edu	No	Yes	Yes	No	No	Student	Yes	Yes	No	Yes	Yes	Yes
Michael	J.	Resiss	Carnegie Mellon University	mreiss@andrew.cmu.edu	No	Yes	Yes	No	No	Student	Yes	Yes	Yes	Yes	Yes	Yes
Judith		Savitskaya	Carnegie Mellon University	jsavitsk@andrew.cmu.edu	No	Yes	Yes	No	No	Student	Yes	No	No	Yes	Yes	Yes
Madav	K.	Shroff	Carnegie Mellon University	mshroff@andrew.cmu.edu	No	Yes	Yes	No	No	Student	Yes	Yes	Yes	Yes	Yes	Yes
Jasper	V.	Thompson	Carnegie Mellon University	jvthomps@andrew.cmu.edu	No	Yes	Yes	No	No	Student	Yes	Yes	Yes	Yes	Yes	Yes
Hannah	S.	Wirtshafter	Carnegie Mellon University	hsw28@cmu.edu	No	Yes	Yes	No	No	Student	Yes	Yes	Yes	Yes	Yes	Yes
David	A.	Zaidins	Carnegie Mellon University	dzaidins@andrew.cmu.edu	No	Yes	Yes	No	No	Student	Yes	No	No	Yes	Yes	Yes
Kathryn	E.	Sheldon	Carnegie Mellon University	kekumer@pitt.edu	No	Yes	Yes	No	No	Instructor	Yes	Yes	Yes	Yes	Yes	Yes
Jonathan		Jarvik	Carnegie Mellon University	jarvik@andrew.cmu.edu	No	Yes	Yes	No	No	Instructor	Yes	Yes	Yes	No	No	Yes
A. Javier		Lopez	Carnegie Mellon University	jlaa@andrew.cmu.edu	No	Yes	Yes	No	No	Instructor	Yes	No	No	Yes	Yes	Yes
Sarah	C.R.	Elgin	Washington University at St. Louis	selgin@biology.wustl.edu	No	Yes	Yes	No	No	Instructor	Yes	No	No	No	No	Yes
Kathleen	A.	Weston-Hafer	Washington University at St. Louis	hafer@wustl.edu	No	Yes	Yes	No	No	Instructor	Yes	Yes	Yes	Yes	Yes	Yes
Christopher	D.	Shaffer	Washington University at St. Louis	shaffer@biology.wustl.edu	No	Yes	Yes	No	No	Instructor	Yes	No	No	Yes	Yes	Yes
Peter	M	Hynes	Washington University at St. Louis	pmhynes@wustl.edu	No	Yes	Yes	No	No	Student	Yes	No	No	Yes	Yes	Yes
Hannah	S	Rabinowitz	Washington University at St. Louis	hsrabinowitz@gmail.com	No	Yes	Yes	No	No	Student	Yes	No	No	Yes	Yes	Yes
Corwin	N	Rhyan	Washington University at St. Louis	cnrhyan@artsci.wustl.edu	No	Yes	Yes	No	No	Student	Yes	No	No	Yes	Yes	Yes
Erika	F	Simms	Washington University at St. Louis	efsims@wustl.edu	No	Yes	Yes	No	No	Student	Yes	Yes	Yes	Yes	Yes	Yes
Emilie	G	Weisser	Washington University at St. Louis	egweisser@gmail.com	No	Yes	Yes	No	No	Student	Yes	No	No	Yes	Yes	Yes
Bo		Zhang	Washington University at St. Louis	bo10029094@yahoo.com	No	Yes	Yes	No	No	Student	Yes	Yes	Yes	Yes	Yes	Yes
Samantha	T	Alford	Washington University at St. Louis	stalford@artsci.wustl.edu	No	Yes	Yes	No	No	Student	Yes	No	No	Yes	Yes	Yes
Alexander	G	Anderson	Washington University at St. Louis	aganders@wustl.edu	No	Yes	Yes	No	No	Student	Yes	Yes	Yes	Yes	Yes	Yes
William	D	Barshop	Washington University at St. Louis	wbarshop@wustl.edu	No	Yes	Yes	No	No	Student	Yes	Yes	Yes	Yes	Yes	Yes
Lisa		Deng	Washington University at St. Louis	ldeng@ARTSCI.wustl.EDU	No	Yes	Yes	No	No	Student	Yes	No	No	Yes	Yes	Yes
Vincent	J	Huang	Washington University at St. Louis	vhuang31@yahoo.com	No	Yes	Yes	No	No	Student	Yes	No	No	Yes	Yes	Yes
Patrick	C	Ng	Washington University at St. Louis	pcng@artsci.wustl.edu	No	Yes	Yes	No	No	Student	Yes	No	No	Yes	Yes	Yes
Anthony	T	Tubbs	Washington University at St. Louis	anthony.tubbs@gmail.com	No	Yes	Yes	No	No	Instructor	No	No	No	Yes	Yes	Yes
Kimberly	R.	Davis	University of California Santa Cruz	kirdavis@ucsc.edu	No	Yes	Yes	No	No	Student	No	Yes	Yes	Yes	Yes	Yes
Garrett	V.	Hagopian	University of California Santa Cruz	gvhagopi@ucsc.edu	No	Yes	Yes	No	No	Student	No	No	No	Yes	Yes	Yes
Nathan	A.	Holz	University of California Santa Cruz	nholz@ucsc.edu	No	Yes	Yes	No	No	Student	No	No	No	Yes	Yes	Yes
Tomas		Kasza	University of California Santa Cruz	tkasza7@gmail.com	No	Yes	Yes	No	No	Student	No	No	No	Yes	Yes	Yes
Victor		Mac	University of California Santa Cruz	vmac@ucsc.edu	No	Yes	Yes	No	No	Student	No	No	No	Yes	Yes	Yes
Kaylee	M.	Nicholson	University of California Santa Cruz	kmnichol@ucsc.edu	No	Yes	Yes	No	No	Student	No	No	No	Yes	Yes	Yes
Lauren	R.	Rodriguez	University of California Santa Cruz	lrrodrig@ucsc.edu	No	Yes	Yes	No	No	Student	No	No	No	Yes	Yes	Yes
Jeffrey	D.	Rubin	University of California Santa Cruz	jdrubin@ucsc.edu	No	Yes	Yes	No	No	Student	No	No	No	Yes	Yes	Yes
Jessica	A.	Ruby	University of California Santa Cruz	jaruby@ucsc.edu	No	Yes	Yes	No	No	Student	No	No	No	Yes	Yes	Yes
Erica	M.	Shepard	University of California Santa Cruz	eshepard08@yahoo.com	No	Yes	Yes	No	No	Student	No	No	No	Yes	Yes	Yes
Clark	L.	Straub	University of California Santa Cruz	clstraub@ucsc.edu	No	Yes	Yes	No	No	Student	No	No	No	Yes	Yes	Yes
Trevor		Sughrue	University of California Santa Cruz	TSughrue@ucsc.edu	No	Yes	Yes	No	No	Student	No	No	No	Yes	Yes	Yes
Brandon	C.	Yee	University of California Santa Cruz	bcyee@ucsc.edu	No	Yes	Yes	No	No	Student	No	No	No	Yes	Yes	Yes
Agustin		Borjon, Jr.	University of California Santa Cruz	aborjon90@gmail.com	No	Yes	Yes	No	No	Student	No	No	No	Yes	Yes	Yes
Grant	A.	Hartzog	University of California Santa Cruz	hartzog@biology.ucsc.edu	No	Yes	Yes	No	No	Instructor	No	No	No	Yes	Yes	Yes
Manuel		Ares, Jr.	University of California Santa Cruz	ares@ucsc.edu	No	Yes	Yes	No	No	Instructor	No	No	No	Yes	Yes	Yes
Amanda	J	Barber	Hope College	amanda.barber@hope.edu	No	Yes	Yes	No	No	Student	Yes	Yes	No	Yes	Yes	Yes
Rebekah	D	Chew	Hope College	rebekah.chew@hope.edu	No	Yes	Yes	No	No	Student	Yes	Yes	No	Yes	Yes	Yes
Jeffrey	M	Corajod	Hope College	jeffrey.corajod@hope.edu	No	Yes	Yes	No	No	Student	Yes	Yes	No	Yes	Yes	Yes
Anne	E	Georges	Hope College	anne.georges@hope.edu	No	Yes	Yes	No	No	Student	Yes	Yes	No	Yes	Yes	Yes
Catherine	J	Harmon	Hope College	catherine.harmon@hope.edu	No	Yes	Yes	No	No	Student	Yes	Yes	No	Yes	Yes	Yes
Erin	N	Hildebrandt	Hope College	erin.hildebrandt@hope.edu	No	Yes	Yes	No	No	Student	Yes	Yes	No	Yes	Yes	Yes
Erica	C	Jansen	Hope College	erica.jansen@hope.edu	No	Yes	Yes	No	No	Student	Yes	Yes	No	Yes	Yes	Yes
Justin	Z	Knutter	Hope College	justin.knutter@hope.edu	No	Yes	Yes	No	No	Student	Yes	Yes	No	Yes	Yes	Yes
Jennifer	R	Laroche	Hope College	jennifer.laroche@hope.edu	No	Yes	Yes	No	No	Student	Yes	Yes	No	Yes	Yes	Yes
Courtney	A	Long	Hope College	courtney.long@hope.edu	No	Yes	Yes	No	No	Student	Yes	Yes	No	Yes	Yes	Yes
Caitlin	E	Peirce	Hope College	caitlin.peirce@hope.edu	No	Yes	Yes	No	No	Student	Yes	Yes	No	Yes	Yes	Yes
Luke	J	Peterson	Hope College	luke.peterson@hope.edu	No	Yes	Yes	No	No	Student	Yes	Yes	No	Yes	Yes	Yes
Andrew	C	Rose	Hope College	andrew.rose@hope.edu	No	Yes	Yes	No	No	Student	Yes	Yes	No	Yes	Yes	Yes
Dale	J	Schipper	Hope College	dale.schipper@hope.edu	No	Yes	Yes	No	No	Student	Yes	Yes	No	Yes	Yes	Yes
Jessica	M	Simmons	Hope College	jessica.simmons@hope.edu	No	Yes	Yes	No	No	Student	Yes	Yes	No	Yes	Yes	Yes
Robert	L	Sjoholm	Hope College	robert.sjoholm@hope.edu	No	Yes	Yes	No	No	Student	Yes	Yes	No	Yes	Yes	Yes
Ingrid	J	Slette	Hope College	ingrid.slette@hope.edu	No	Yes	Yes	No	No	Student	Yes	Yes	No	Yes	Yes	Yes
Angelica	N	Willis	Hope College	angelica.willis@hope.edu	No	Yes	Yes	No	No	Student	Yes	Yes	No	Yes	Yes	Yes
Aaron	A	Best	Hope College	best@hope.edu	No	Yes	Yes	No	No	Instructor	Yes	No	Yes	Yes	Yes	Yes
Joseph		Stukey	Hope College	stukey@hope.edu	No	Yes	Yes	No	No	Instructor	Yes	No	Yes	Yes	Yes	Yes
Ann	M.	Findley	University of Louisiana at Monroe	afindley@ulm.edu	No	Yes	Yes	No	No	Instructor	No	Yes	Yes	Yes	Yes	Yes
Christopher	R.	Gissendanner	University of Louisiana at Monroe	gissendanner@ulm.edu	No	Yes	Yes	No	No	Instructor	No	Yes	Yes	Yes	Yes	Yes
Jeremy	S.	Harmson	University of Louisiana at Monroe	jeremyh3507@aol.com	No	Yes	Yes	No	No	Instructor	No	Yes	Yes	Yes	Yes	Yes
John	R.	Warner	University of Louisiana at Monroe	warnerjr@warhawks.ulm.edu	No	Yes	Yes	No	No	Student	No	No	No	Yes	Yes	Yes
Brandon	K.	Morgan	University of Louisiana at Monroe	morganbk@warhawks.ulm.edu	No	Yes	Yes	No	No	Student	No	No	No	Yes	Yes	Yes
Ericka	L.	Hufford	University of Louisiana at Monroe	hufforel@warhawks.ulm.edu	No	Yes	Yes	No	No	Student	No	No	No	Yes	Yes	Yes
Gina	M.	Hogan	University of Louisiana at Monroe	hogangm@warhawks.ulm.edu	No	Yes	Yes	No	No	Student	No	No	No	Yes	Yes	Yes
Angela	E.	Engelsen	University of Louisiana at Monroe	aengel1@tigers.lsu.edu	No	Yes	Yes	No	No	Student	No	Yes	Yes	Yes	Yes	Yes
Lauren	N.	Broadway	University of Louisiana at Monroe	lauren.broadway@yahoo.com	No	Yes	Yes	No	No	Student	No	Yes	Yes	Yes	Yes	Yes
Kohana	D.	Leuba	University of Pittsburgh	Kohana_leuba@brown.edu	No	Yes	Yes	No	No	Student	Yes	Yes	Yes	Yes	Yes	Yes
Sequoia	I.	Leuba	University of Pittsburgh	sequoia.leuba@gmail.com	No	Yes	Yes	No	No	Student	Yes	Yes	Yes	Yes	Yes	Yes
Victoria	G.	Hohenstein	University of Pittsburgh	vhohens1@jhu.edu	No	Yes	Yes	No	No	Student	Yes	Yes	Yes	Yes	Yes	Yes
Ching-Chung		Ko	University of Pittsburgh	chk56@pitt.edu	No	Yes	Yes	No	No	PHIRE staff	No	Yes	Yes	Yes	Yes	Yes
Melissa	J.	Fritz	University of Pittsburgh	elissamay.itzfray@gmail.com	No	Yes	Yes	No	No	Student	No	No	Yes	No	No	Yes
Charles	A.	Bowman	University of Pittsburgh	cab106@pitt.edu	No	No	Yes	No	No	Student	No	No	No	No	Yes	Yes
Welkin	H.	Pope	University of Pittsburgh	welkin@pitt.edu	Yes	Yes	Yes	No	Yes	Postdoc	No	No	Yes	Yes	Yes	Yes
Deborah		Jacobs-Sera	University of Pittsburgh	djs@pitt.edu	Yes	No	Yes	No	No	PHIRE staff	No	No	Yes	Yes	Yes	Yes
Craig	L.	Peebles	University of Pittsburgh	cpeebles@pitt.edu	Yes	No	Yes	No	No	Instructor	No	No	No	Yes	Yes	Yes
Daniel	A.	Russell	University of Pittsburgh	dar78@pitt.edu	No	Yes	Yes	No	No	PHIRE staff	No	Yes	Yes	Yes	Yes	Yes
Roger	W.	Hendrix	University of Pittsburgh	rxh@pitt.edu	Yes	No	Yes	Yes	Yes	Instructor	No	No	No	Yes	Yes	Yes
Graham	F.	Hatfull	University of Pittsburgh	gfh@pitt.edu	Yes	No	Yes	Yes	Yes	Instructor	No	No	No	Yes	Yes	Yes
Note: SEA: Science Education Alliance; PHIRE: Phage Hunters Intergaring Research and Education

## Sheet: Sheet2
Acknowledgement list
name	school
Arramraju, Seena	UMBC
Bennett, Daniel	UMBC
Bier, Samantha	UMBC
Blackburn, Grace	UMBC
Choi, Daniel	UMBC
Corporandy, Aubree	UMBC
George, Praveen	UMBC
Ghaffari, Helya	UMBC
Haliyur, Rachana	UMBC
Hecht, Robert	UMBC
Kaul, Nikhita	UMBC
Lambert, Arielle	UMBC
Lindahl, Lasse	UMBC
Meheux, Carlos	UMBC
Murphy, Ralph	UMBC
Nazareno, Nathan	UMBC
Newcomer, Patrick	UMBC
Nguyen, Trang	UMBC
Oliveras, Analiz	UMBC
Perskie, Hannah	UMBC
Poland, Jenna	UMBC
Puhl, Jake	UMBC
Shields, Anna	UMBC
Stark, Sarah	UMBC
Tatum, David	UMBC
Tomobi, Olawale	UMBC

## Sheet: Sheet3
	Department	School	addrress 1	address2	City	State	zip	phone number
1	Department of Biological Sciences	Carnegie Mellon University	440 Fifth Avenue		Pittsburgh	Pennsylvania	15213	412-268-3180
2	Biology Department	College of William & Mary	P.O. Box 8795		Williamsburg	Virginia	23187	757 221 2489
3	Biology Department	Hope College	A. Paul Schaap Science Center	35 East 12th Street	Holland	Michigan	49423	616-395-7376
4	Science Education Alliance	Howard Hughes Medical Institute	4000 Jones Bridge Road		Chevy Chase	Maryland	20815	301-215-8500
5	Department of Biology	James Madison University	820 Madison Drive MSC 7801		Harrisonburg	Virginia	22807	540-568-3551
6	Department of Zoology	Oregon State University	2000 Cordley Hall		Corvallis	Oregon	97331	541-737-3698
7	Department of Biology	Spelman College	Science Center	350 Spelman Lane	Atlanta	Georgia	30314	404-270-5722
8	Division of Biological Sciences	University of California, San Diego	9500 Gilman Drive	4113 Natural Sciences Building	LaJolla	California	92093	858-534-2230
9	Biological Sciences	University of California, Santa Cruz	1156 High Street		Santa Cruz	California	95064	831 459 4628
10	Department of Biology	University of Louisiana at Monroe	700 University Avenue		Monroe	Louisiana	71209	318-342-1750
11	Department of Biological Sciences	University of Mary Washington	1301 College Ave		Fredericksburg	Virginia	22401	540-54-1415
12	Department of Biological Sciences	University of Maryland, Baltimore County	1000 Hilltop Circle		Baltimore	Maryland	21250	410-455-2246
13	Department of Biological Sciences	University of Pittsburgh	4249 Fifth Avenue		Pittsburgh	Pennsylvania	15260	412-624-4350
14	Department of Biology	Washington University in St. Louis	Campus Box 1037	One Brookings Drive	St. Louis	Missouri	63130	314-935-5348
